# Supplementary material
Source: Springer Nature journal article supplement (https://www.springermedizin.de/resource/supplementary/12889_2012_4604_MOESM2_ESM.pdf/9492528)

# ROC-curve

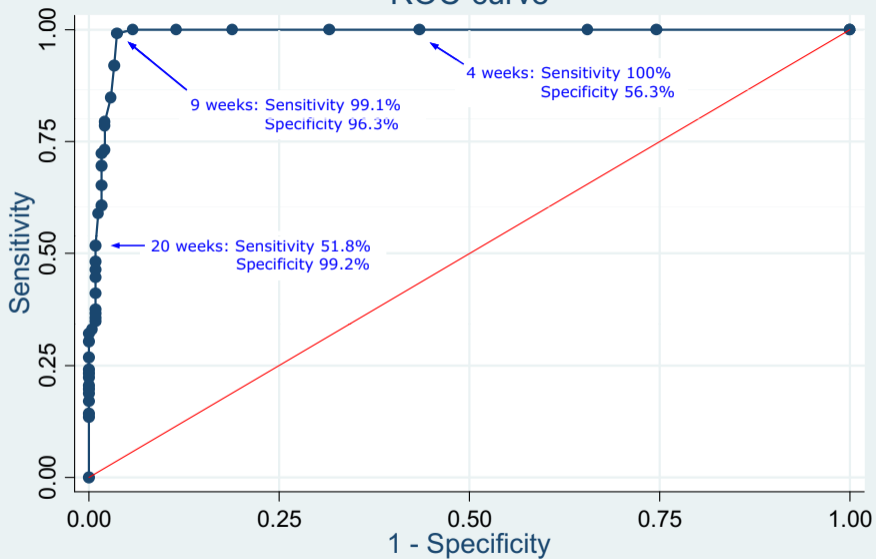

Area under ROC curve = 0.9877

Supplement: MOESM2 [file 9492528]
